# Supplementary material for: Virtual reality-empowered deep-learning analysis of brain cells
Source: Nat Methods. 2024 Apr 22;21(7):1306–15. doi: 10.1038/s41592-024-02245-2 (PMC11239522; doi:10.1038/s41592-024-02245-2)
Supplement: Supplementary file 9 — Numerical source data. [file 41592_2024_2245_MOESM9_ESM.xlsx]

## Sheet: Fig.2b
DynUt	SegResNet	Transformer UNet	DELiVR
0.741707	0.746277	0.751546	0.791841

## Sheet: Fig.2c
ClearMap	ClearMap2	Optimized ClearMap	Ilastik	DELIVR
0.019618	0.418894	0.652671	0.240187	0.791841
