# Supplementary material for: Virtual reality-empowered deep-learning analysis of brain cells
Source: Nat Methods. 2024 Apr 22;21(7):1306–15. doi: 10.1038/s41592-024-02245-2 (PMC11239522; doi:10.1038/s41592-024-02245-2)
Supplement: Supplementary file 13 — Numerical source data. [file 41592_2024_2245_MOESM13_ESM.xlsx]

## Sheet: Extended Data Fig.4a
Gastrocnemius muscle weight [g]
PBS	NC26	C26
0.201	0.16	0.153
0.196	0.202	0.151
0.168	0.169	0.152
0.193	0.181	0.136
0.135	0.15	0.134
0.173	0.171	0.129
0.168	0.153	0.117
0.151	0.159	0.104
0.164		0.13
0.154		0.123
0.163		0.11
0.149		0.141

## Sheet: Extended Data Fig.4b
Epididymal white adipose tissue weight [g]
PBS	NC26	C26
0.354	0.426	0.125
0.456	0.315	0.316
0.331	0.337	0.08
0.346	0.349	0.289
0.198	0.35	0.231
0.346	0.397	0.163
0.276	0.2	0.058
0.357	0.245	0.048
0.2		0.017
0.196		0.059
0.221		0.047
0.324		0.088

## Sheet: Extended Data Fig.4c
Subcutaneous white adipose tissue weight [g]
PBS	NC26	C26
0.295	0.427	0.04
0.353	0.166	0.182
0.252	0.235	0.052
0.207	0.196	0.139
0.158	0.265	0.158
0.29	0.29	0.075
0.221	0.14	0.043
0.208	0.169	0.036
0.187		0.029
0.132		0.048
0.211		0.05
0.18		0.054

## Sheet: Extended Data Fig. 4d
Brain weight [g]
PBS	NC26	C26
0.441	0.428	0.441
0.438	0.448	0.431
0.447	0.45	0.423
0.445	0.446	0.428
0.402	0.46	0.418
0.443	0.489	0.41
0.425	0.413	0.41
0.437		0.424
0.429		0.433
0.421		0.466
0.434		0.428
0.419		0.414
